# Supplementary material for: Longitudinal time course of muscle impairments during partial weight-bearing in rats
Source: PubMed Central journal article supplement (PMC6706399; doi:10.1038/s41526-019-0080-5), 2019-08-22
Supplement: 41526_2019_80_MOESM1_ESM.pdf [file 41526_2019_80_MOESM1_ESM.pdf]

## Supplementary Material

### Supplementary Table 1: Normalized Tetanic Impulse at 28 days (mN.sec.g<sup>-1</sup>)

Tetanic impulse recording at 28 days was normalized by the wet mass of the triceps surae for each animal to provide a value of the intrinsic force. Results are presented as mean  $\pm$  SEM, n=3-6 per group.

| <b>Groups</b> | <b>PWB100</b>   | <b>PWB70</b>    | <b>PWB40</b>    | <b>PWB20</b>    |
|---------------|-----------------|-----------------|-----------------|-----------------|
|               | 9.87 $\pm$ 1.64 | 7.68 $\pm$ 0.46 | 7.90 $\pm$ 0.59 | 6.17 $\pm$ 1.25 |

*Results were analyzed using a 1-way ANOVA, followed by the post hoc test for linear trend (p=0.043)*

### Supplementary Table 2: Percentage of type 1 skeletal myofibers in the triceps surae muscles

Histomorphometry was used to quantify the number of type 1 slow-twitch skeletal fibers in the soleus and gastrocnemius of our animals and assess muscle composition. Results are presented as mean  $\pm$  SEM, n=11-12 per group.

|               | <b>PWB100</b>    | <b>PWB70</b>     | <b>PWB40</b>     | <b>PWB20</b>     |
|---------------|------------------|------------------|------------------|------------------|
| <b>Day 7</b>  |                  |                  |                  |                  |
| Soleus        | 90.96 $\pm$ 1.25 | 88.28 $\pm$ 2.36 | 89.15 $\pm$ 1.85 | 90.19 $\pm$ 2.62 |
| Gastrocnemius | 10.73 $\pm$ 1.93 | 11.43 $\pm$ 1.93 | 12.52 $\pm$ 1.73 | 10.92 $\pm$ 1.76 |
| <b>Day 14</b> |                  |                  |                  |                  |
| Soleus        | 86.94 $\pm$ 2.41 | 85.32 $\pm$ 2.65 | 78.51 $\pm$ 2.07 | 84.08 $\pm$ 2.13 |
| Gastrocnemius | 10.1 $\pm$ 1.67  | 11.07 $\pm$ 1.07 | 10.18 $\pm$ 1.78 | 12.46 $\pm$ 1.81 |
| <b>Day 28</b> |                  |                  |                  |                  |
| Soleus        | 88.68 $\pm$ 1.81 | 85.85 $\pm$ 2.36 | 82.39 $\pm$ 3.08 | 84.78 $\pm$ 3.46 |
| Gastrocnemius | 11.53 $\pm$ 1.58 | 12.18 $\pm$ 2.01 | 14.89 $\pm$ 2.88 | 12.86 $\pm$ 2.40 |

*Results were analyzed using 2-way ordinary ANOVA followed by Tukey's post hoc test.  
Gastrocnemius: ns. Soleus: Effect of time p=0.0019 Effect of PWB level p=0.048*
